# Supplementary material for: Investigation of the Drug Carrier Properties of Insoluble Cyclodextrin Polymer Microspheres
Source: MDPI journal article supplement (doi:10.3390/biom12070931), 2022-07-02
Supplement: s1 [file s1]

# Supporting Information to

## Investigation of the drug carrier properties of insoluble cyclodextrin polymer microspheres

Ádám Haimhoffer<sup>1,2,3</sup>, Alexandra Vas<sup>1</sup>, Gabriella Árvai<sup>1</sup>, Éva Fenyvesi<sup>4</sup>, László Jicsinszky<sup>5</sup>, István Budai<sup>6</sup>, Attila Bényei<sup>7</sup>, Géza Regdon, Jr.<sup>8</sup>, Ágnes Rusznyák<sup>1,2,3</sup>, Gábor Vasvári<sup>1</sup>, Judit Váradi<sup>1</sup>, Ildikó Bácskay<sup>1,3</sup>, Miklós Vecsernyés<sup>1</sup>, Ferenc Fenyvesi<sup>1\*</sup>

<sup>1</sup> Department of Pharmaceutical Technology, Faculty of Pharmacy, University of Debrecen, Nagyerdei St. 98, H-4032 Debrecen, Hungary;

<sup>2</sup> Doctoral School of Pharmaceutical Sciences, University of Debrecen, H-4032 Debrecen, Hungary

<sup>3</sup> Institute of Healthcare Industry, University of Debrecen, Nagyerdei St. 98, H-4032 Debrecen, Hungary

<sup>4</sup> Cyclolab Cyclodextrin R & D Laboratory Ltd., Illatos St. 7, H-1097 Budapest, Hungary

<sup>5</sup> Department of Drug Science and Technology, University of Turin. Via P. Giuria 9, 10125 Turin, Italy

<sup>6</sup> Faculty of Engineering, University of Debrecen. H-4028 Debrecen, Ótemető street 2-4., Hungary

<sup>7</sup> Department of Physical Chemistry, University of Debrecen. H-4032 Debrecen, Egyetem Sqr. 1., Hungary

<sup>8</sup> Institute of Pharmaceutical Technology and Regulatory Affairs, University of Szeged, H-6720 Szeged, Eötvös u. 6., Hungary

\* Correspondence: [fenyvesi.ferenc@pharm.unideb.hu](mailto:fenyvesi.ferenc@pharm.unideb.hu)

## Table of Contents

|           |                                                                                                                                                                |      |
|-----------|----------------------------------------------------------------------------------------------------------------------------------------------------------------|------|
| Figure S1 | The swelling of $\beta$ CDPB in oil and water.                                                                                                                 | p.2  |
| Scheme S1 | Curcumin, $\beta$ CD polymers, Estradiol                                                                                                                       | p.2  |
| Figure S2 | IR spectra of pure compounds: Curcumin, Estradiol, Bead Polymer, and $\beta$ CDPIS                                                                             | p.3  |
| Figure S3 | IR spectra of $\beta$ -cyclodextrin microbeads (Bead, synthesized in solution) and mechanochemically synthesized insoluble $\beta$ CD polymer ( $\beta$ CDPIS) | p.4  |
| Figure S4 | Simulated and measured IR spectra of physical mixtures of Curcumin-Cyclodextrin insoluble polymers                                                             | p.5  |
| Figure S5 | IR spectra of Curcumin-Cyclodextrin insoluble polymer polymer physical mixtures and complexes                                                                  | p.6  |
| Figure S6 | Simulated and measured IR spectra of physical mixtures of Estradiol-Cyclodextrin insoluble polymers                                                            | p.7  |
| Figure S7 | IR spectra of Estradiol-Cyclodextrin insoluble polymer polymer physical mixtures and complexes                                                                 | p.8  |
| Table S1  | IR bands (in cm <sup>-1</sup> ) of $\beta$ CD polymers, Curcumin, and 17 $\beta$ -Estradiol                                                                    | p.9  |
| Table S2  | IR bands (in cm <sup>-1</sup> ) of Curcumin $\beta$ CD polymer physical mixtures and complexes                                                                 | p.10 |
| Table S3  | IR bands (in cm <sup>-1</sup> ) of 17 $\beta$ -Estradiol CD polymer physical mixtures and complexes                                                            | p.11 |

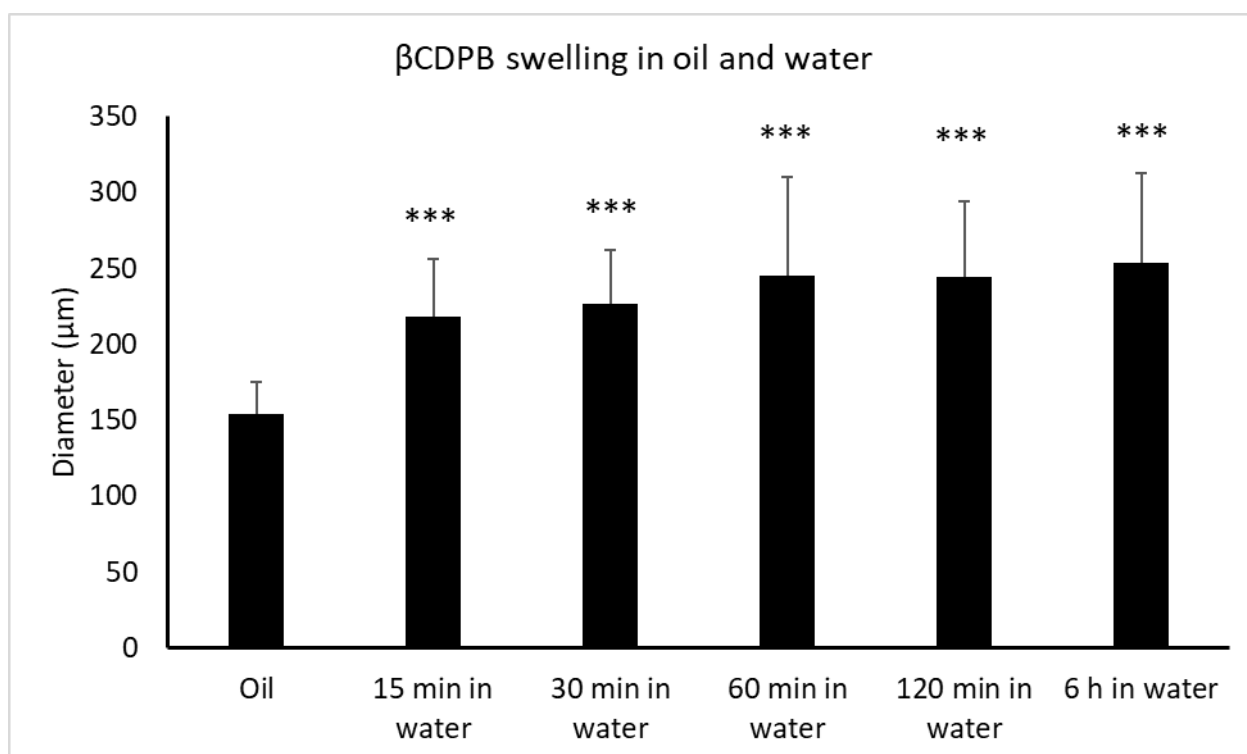

Figure S1: The swelling of  $\beta$ CDPB in oil and water.

$\beta$ CDPB rapidly swelled in water and the mean diameter of the cyclodextrin beads significantly increased in water at different time points compared to the beads kept in paraffin oil (Data are presented as mean $\pm$ SD, n=20-30; \*\*\* - p<0,001).

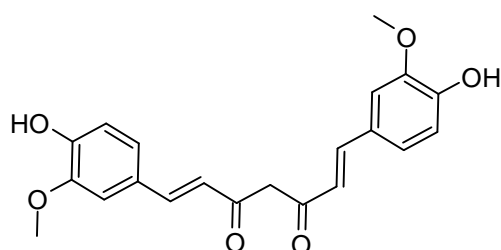

Scheme S1: Curcumin

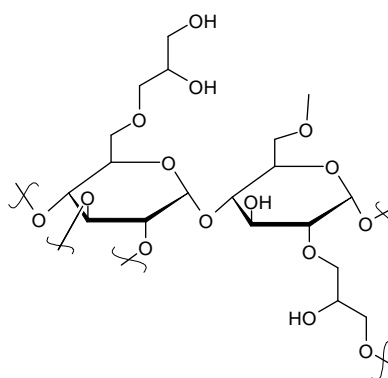

$\beta$ CD polymers

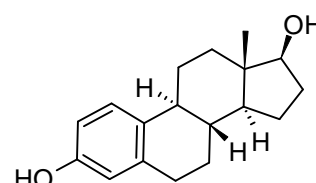

Estradiol

FT-IR (ATR) experiments performed on a PerkinElmer SpectrumTwo instrument, using 64 scans at  $1\text{ cm}^{-1}$  resolution of  $0.25\text{ cm}^{-1}$  data interval with Spectrum IR v10.2 software. Evaluation of spectra used SpectraGryph 1.2.16d software (Software for optical spectroscopy by dr. Friedrich Menges, Oberstdorf, Germany, <http://spectroscopy.ninja>)

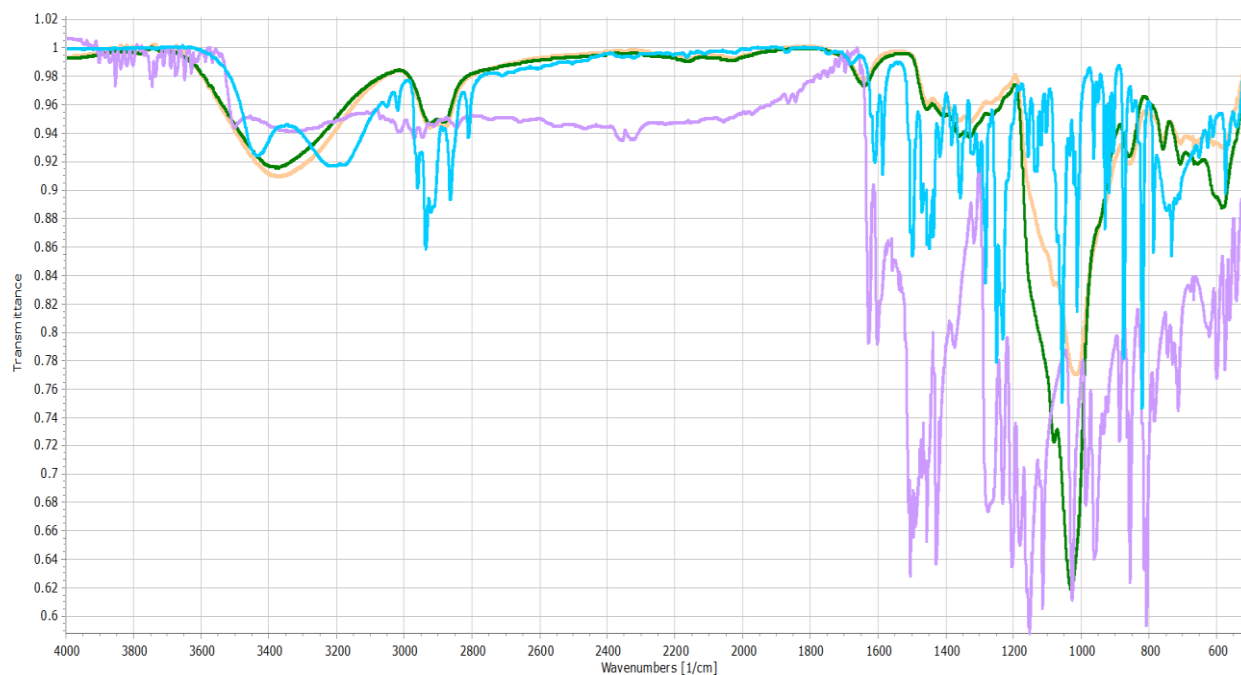

Figure S2: IR spectra of pure compounds: Curcumin, Estradiol, Bead Polymer, and βCDPIS

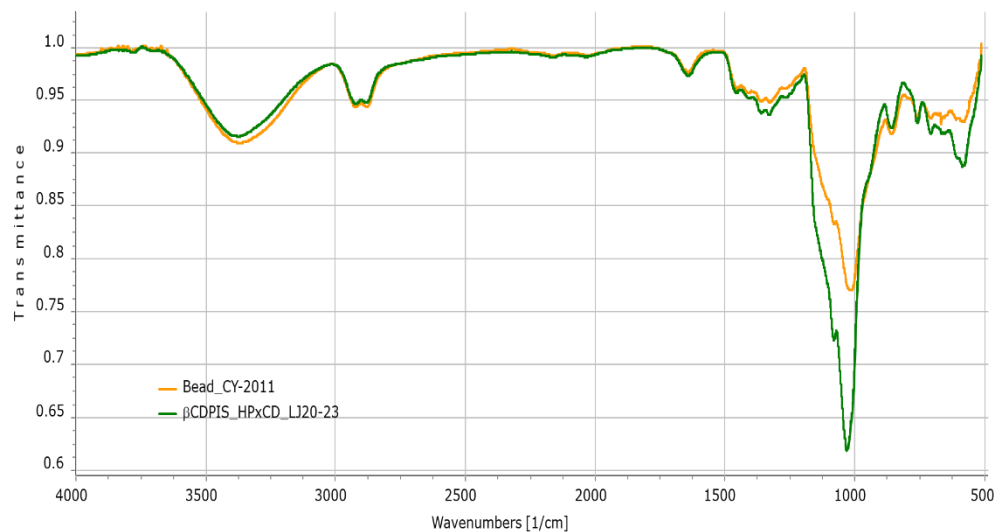

Full (500-4000  $\text{cm}^{-1}$ ) spectrum

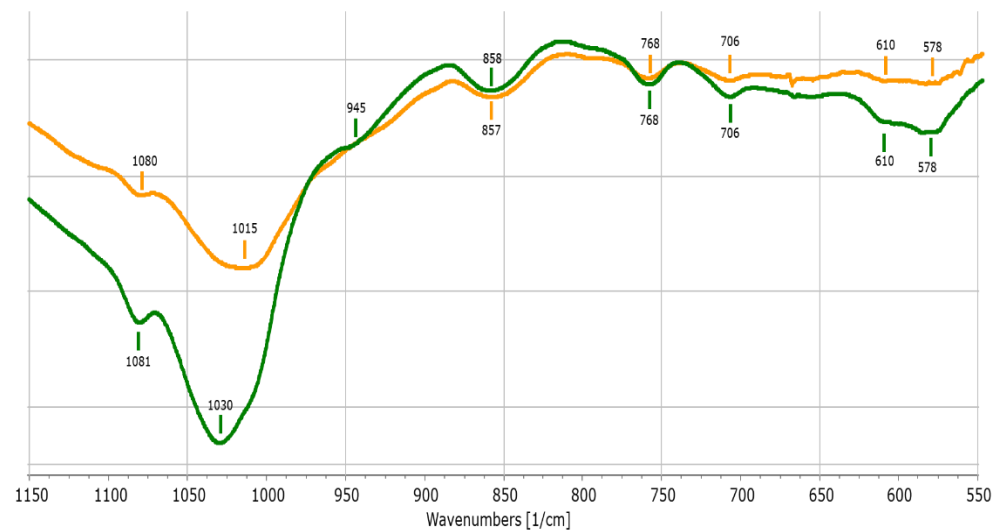

a) 550-1150  $\text{cm}^{-1}$  region

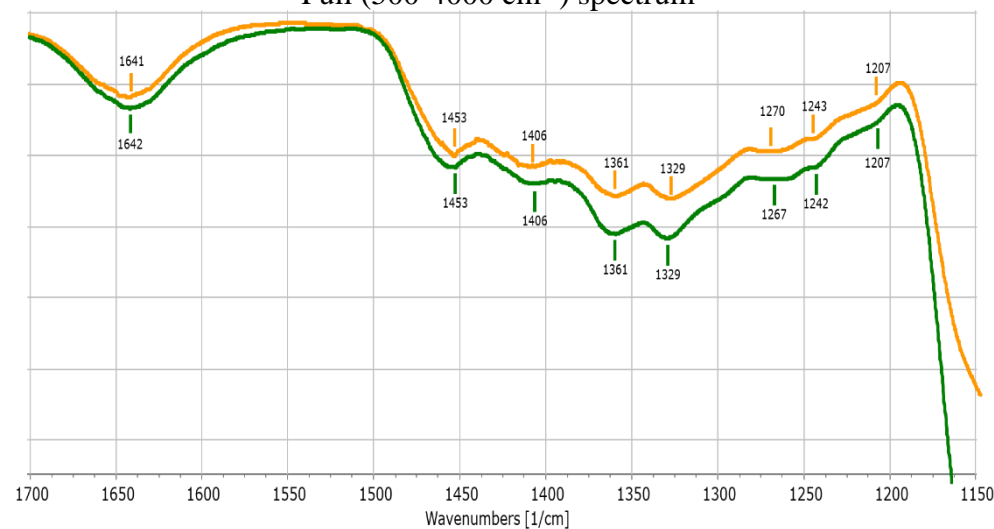

b) 1150-1700  $\text{cm}^{-1}$  region

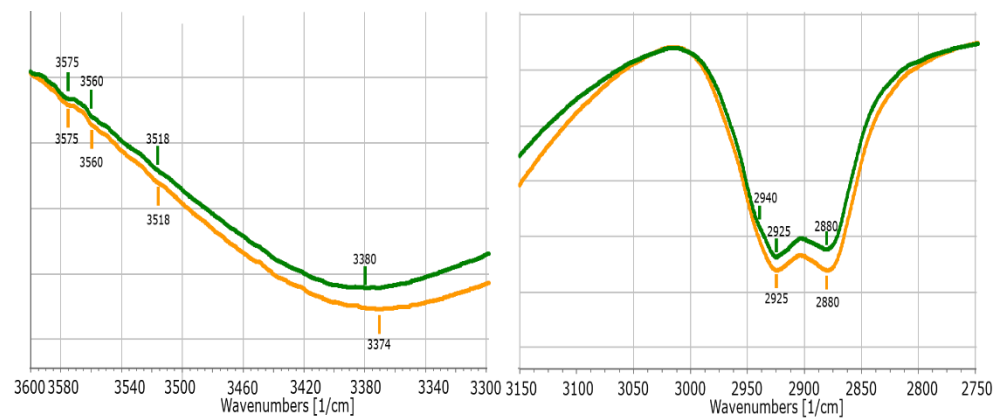

c) 2750-3600  $\text{cm}^{-1}$  region

Figure S3: IR spectra of  $\beta$ -cyclodextrin microbeads (Bead, synthesized in solution) and mechanochemically synthesized insoluble  $\beta$ CD polymer ( $\beta$ CDPIS)

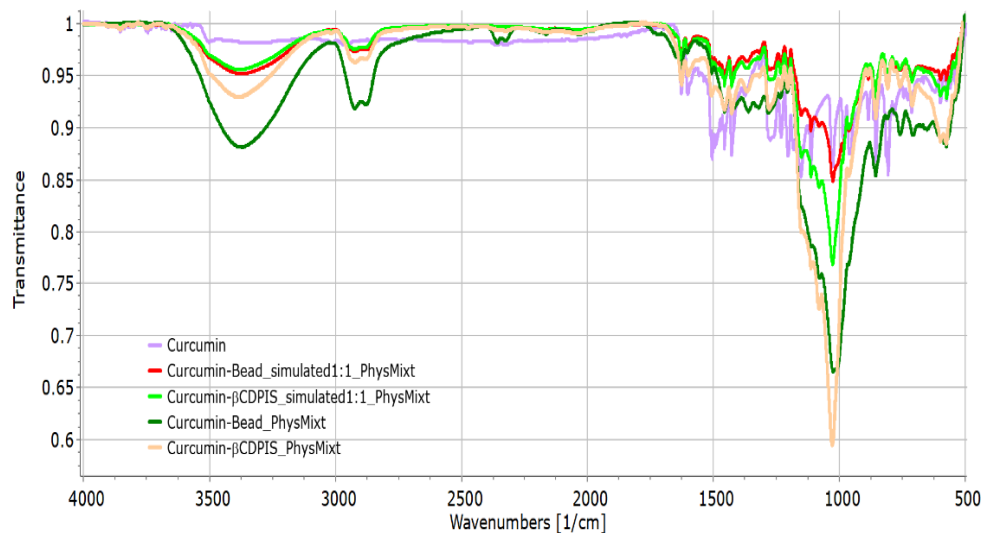

Full (500-4000  $\text{cm}^{-1}$ ) spectrum

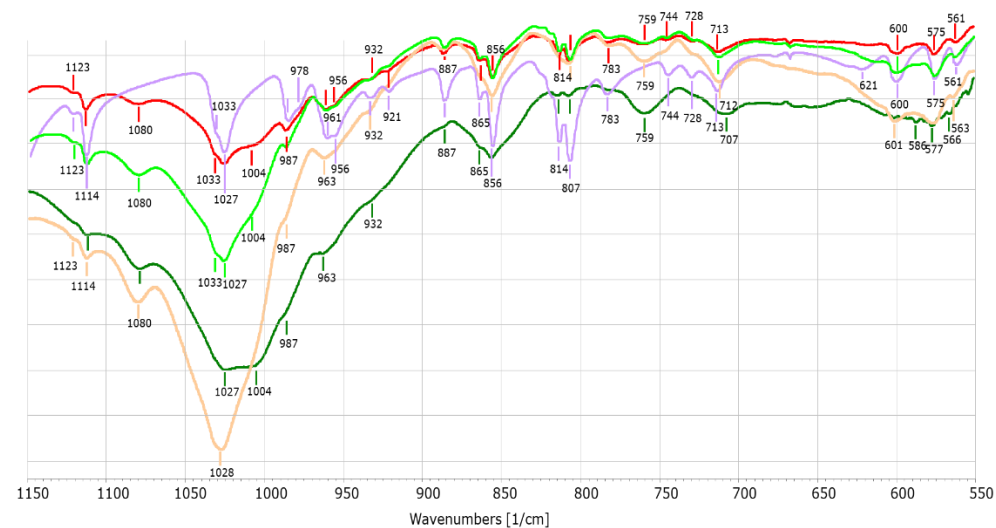

a) 550-1150  $\text{cm}^{-1}$  region

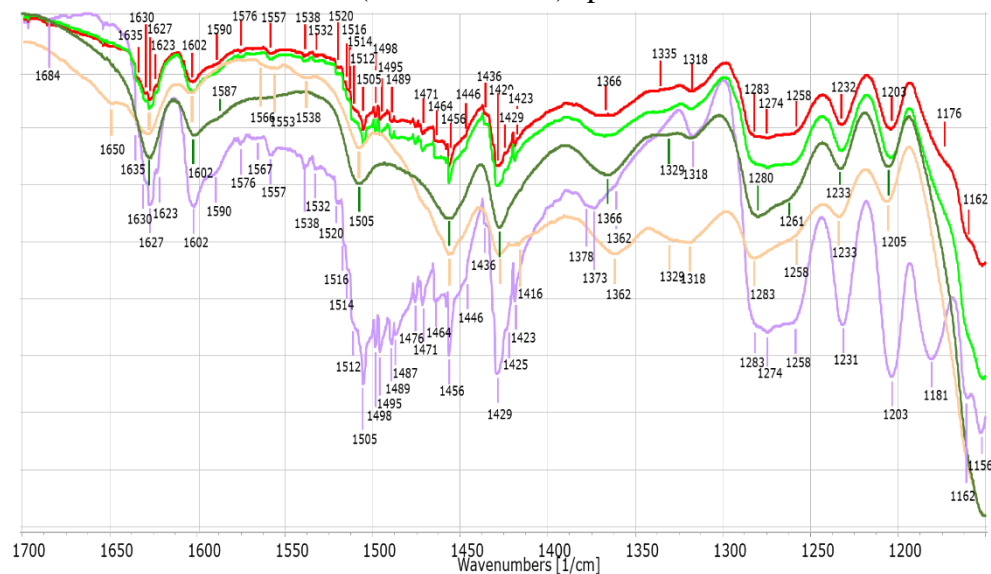

b) 1150-1700  $\text{cm}^{-1}$  region

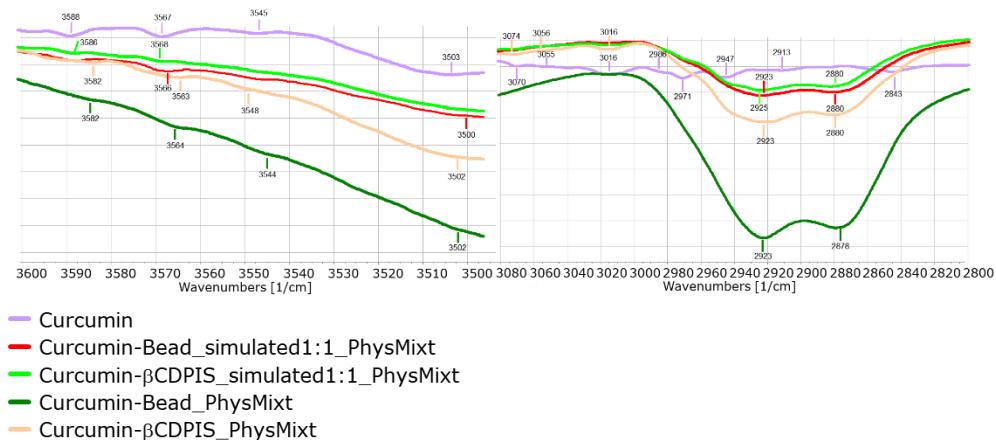

c) 2750-3600  $\text{cm}^{-1}$  region

Figure S4: Simulated and measured IR spectra of physical mixtures of Curcumin-Cyclodextrin insoluble polymers

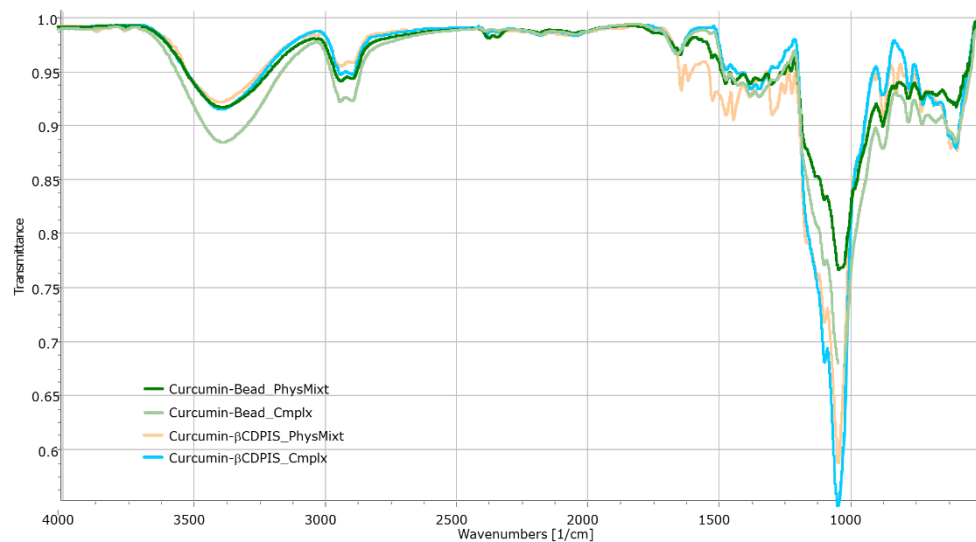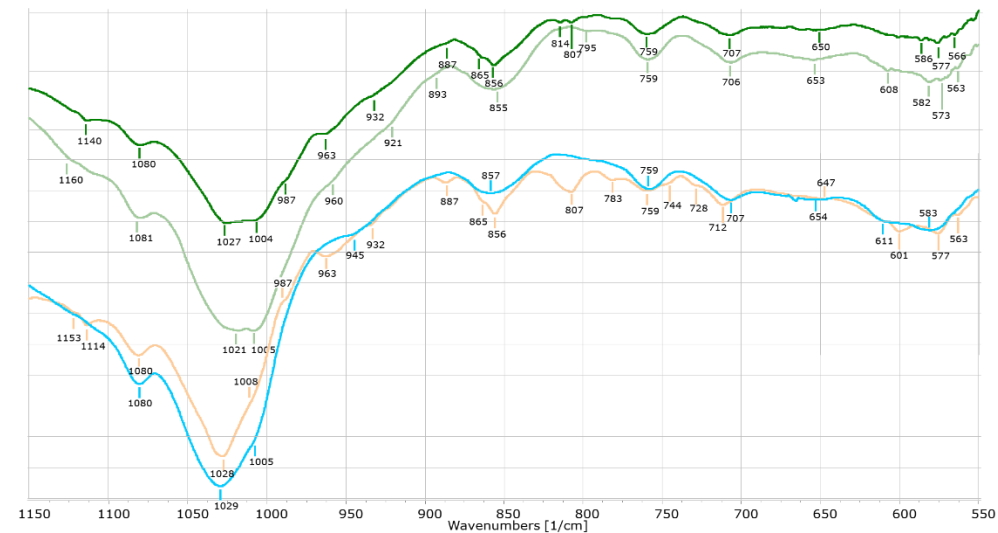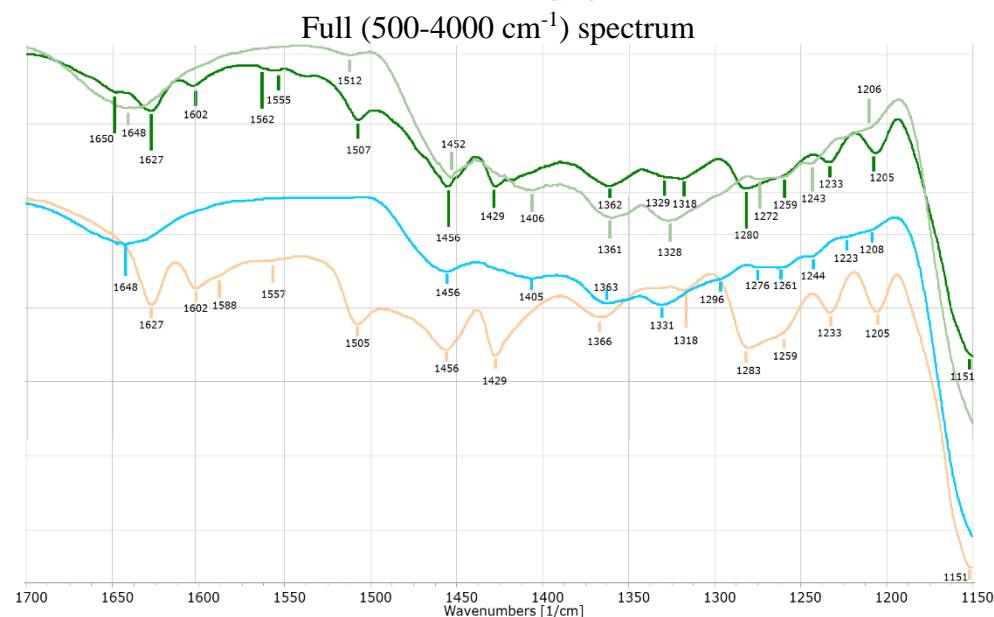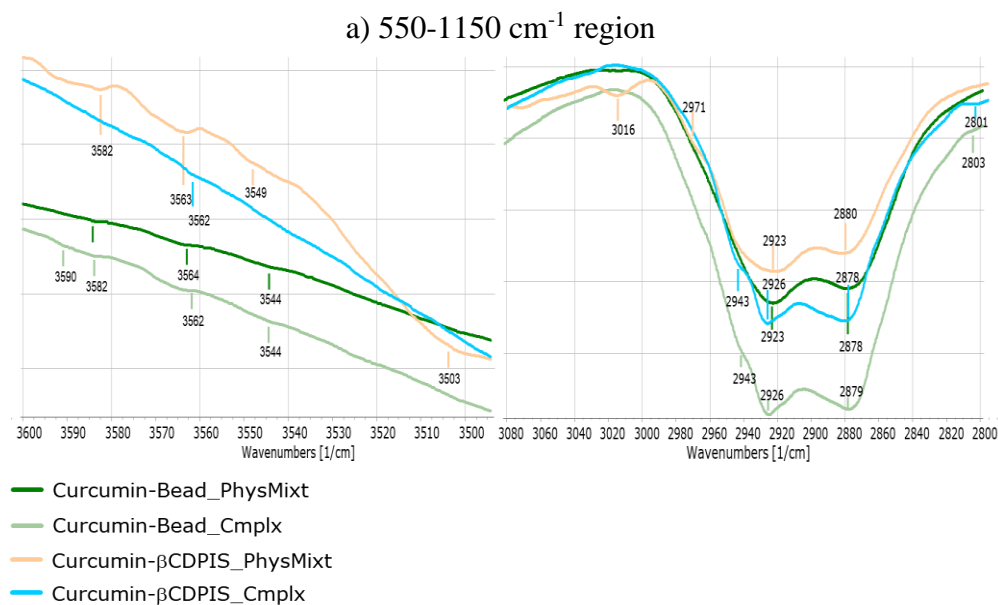

b) 1150-1700  $\text{cm}^{-1}$  region

c) 2750-3600  $\text{cm}^{-1}$  region

Figure S5: IR spectra of Curcumin-Cyclodextrin insoluble polymer polymer physical mixtures and complexes

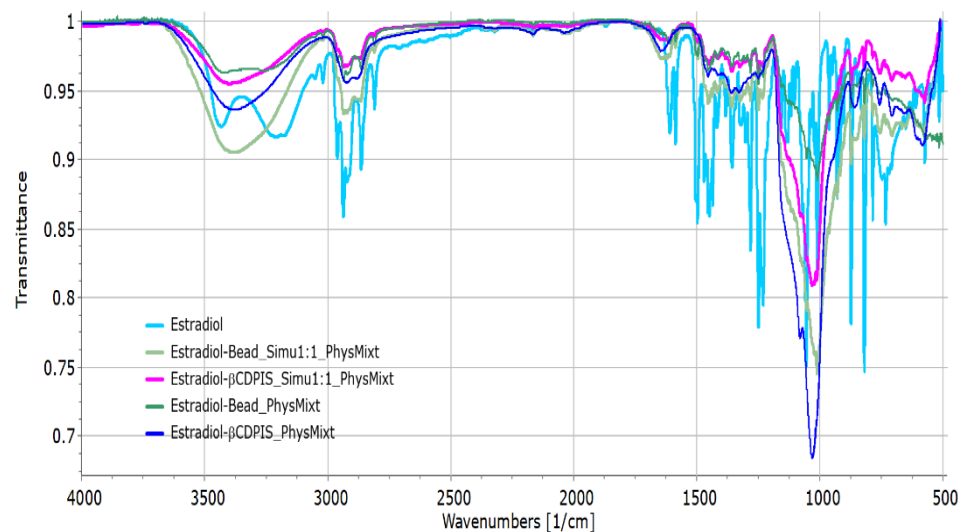

Full (500-4000  $\text{cm}^{-1}$ ) spectrum

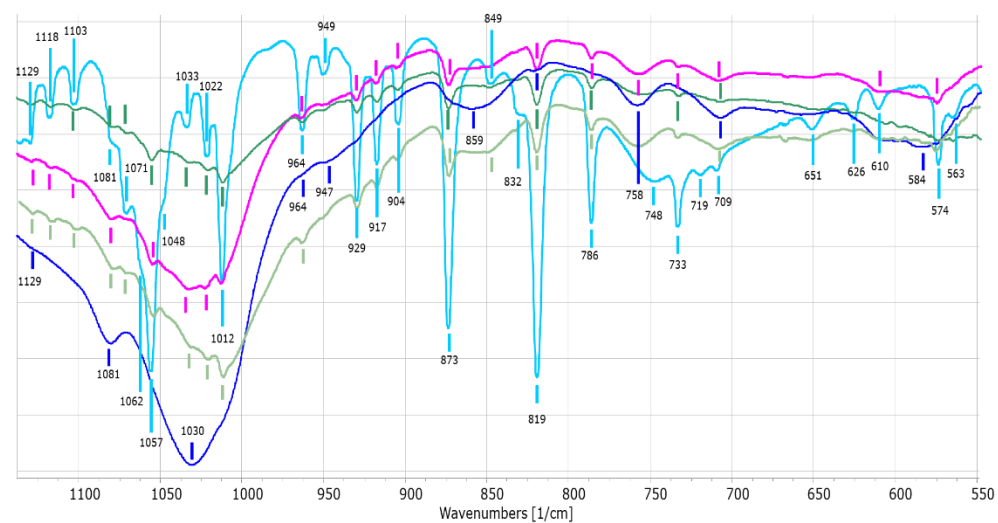

a) 550-1150  $\text{cm}^{-1}$  region

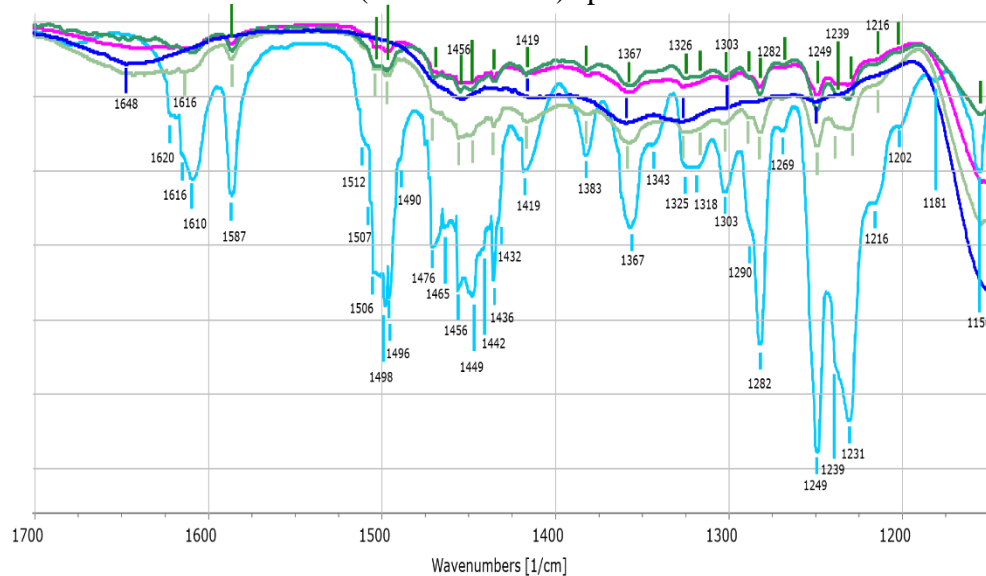

b) 1150-1700  $\text{cm}^{-1}$  region

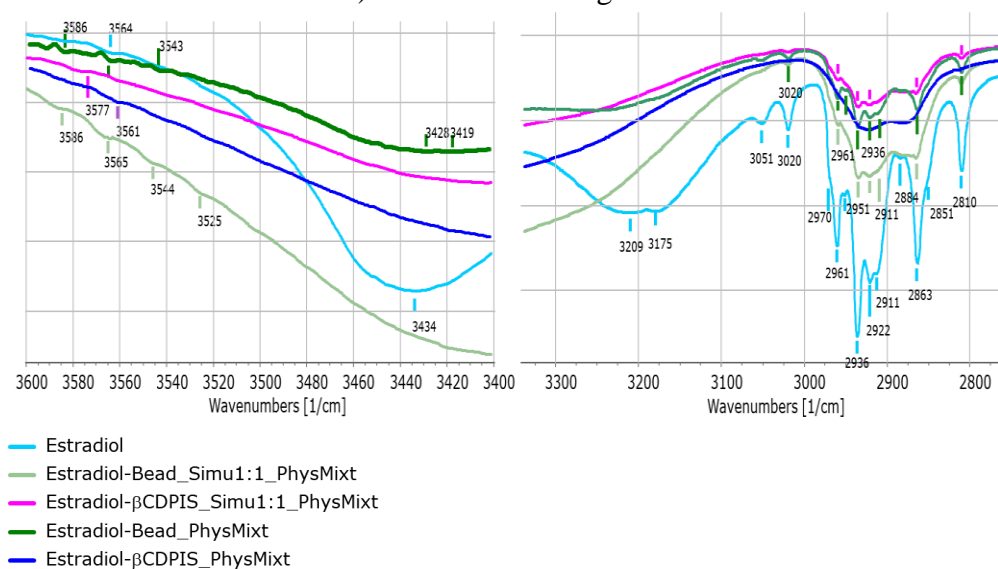

c) 2750-3600  $\text{cm}^{-1}$  region

Figure S6: Simulated and measured IR spectra of physical mixtures of Estradiol-Cyclodextrin insoluble polymers

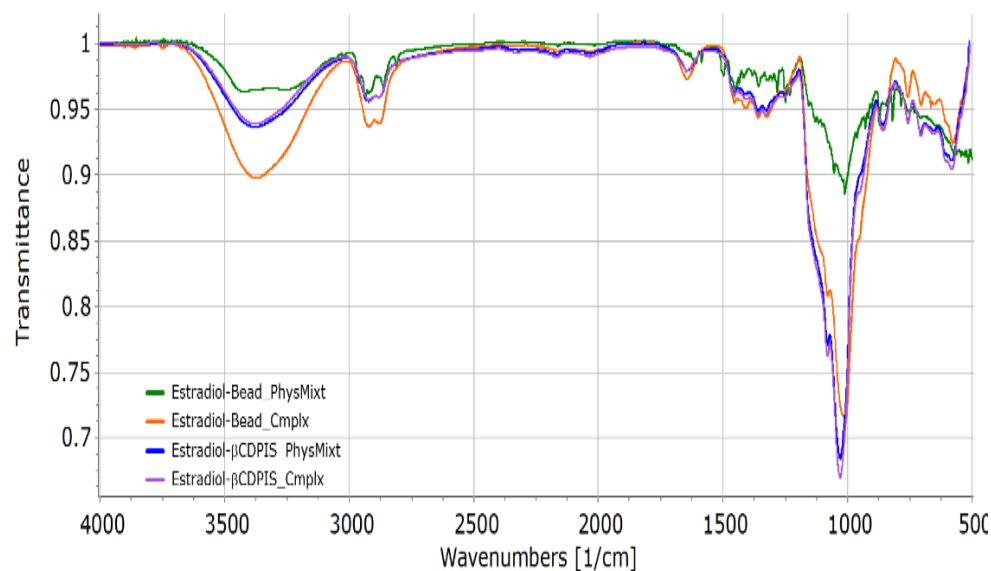

Full (500-4000  $\text{cm}^{-1}$ ) spectrum

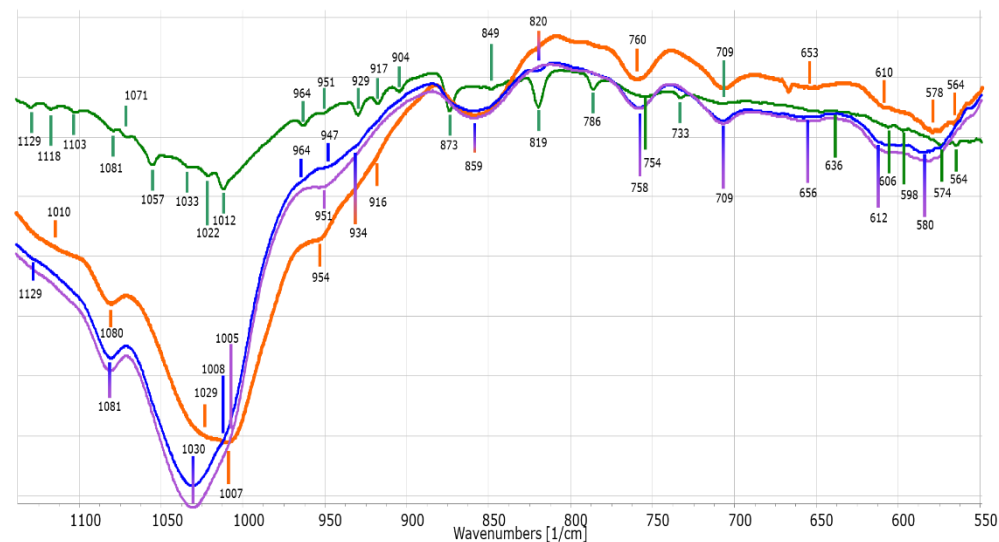

a) 550-1150  $\text{cm}^{-1}$  region

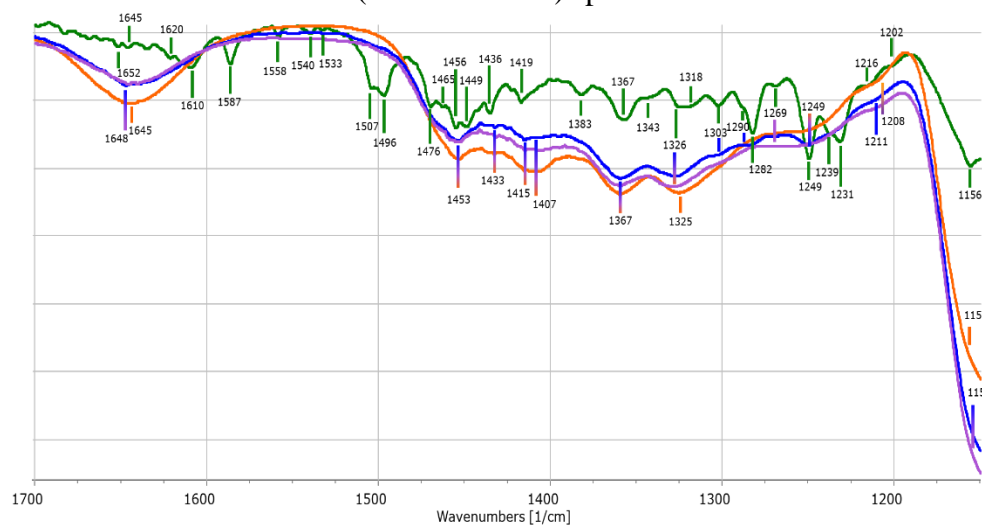

b) 1150-1700  $\text{cm}^{-1}$  region

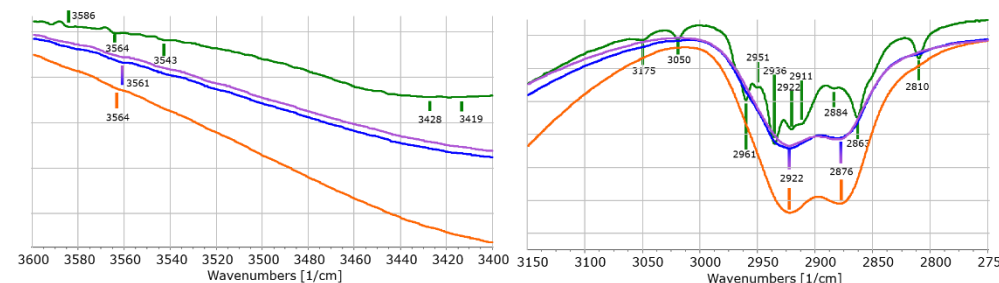

c) 2750-3600  $\text{cm}^{-1}$  region

Figure S7: IR spectra of Estradiol-Cyclodextrin insoluble polymer polymer physical mixtures and complexes



Table S1: IR bands (in cm<sup>-1</sup>) of  $\beta$ CD polymers, Curcumin, and 17 $\beta$ -Estradiol

| Group                                       | Bead                      | $\beta$ CDPIS             | Curcumin                                                                                                                                                       | 17 $\beta$ -Estradiol                                                                                    |
|---------------------------------------------|---------------------------|---------------------------|----------------------------------------------------------------------------------------------------------------------------------------------------------------|----------------------------------------------------------------------------------------------------------|
| Phenolic O-H stretch/H-bond                 |                           |                           | 3588; 3545; 3503                                                                                                                                               | 3586; 3543; 3434                                                                                         |
| O-H stretch/H-bond                          | 3575; 3560;<br>3518; 3374 | 3575; 3560;<br>3518; 3380 | 3324; 3192; (3140-<br>3480, very diffuse) *                                                                                                                    | 3209; 3175; (3100-<br>3300, very diffuse);                                                               |
| H-C=C-H                                     |                           |                           | (3070; 3055); 3016                                                                                                                                             | (3075; 3051); 3020                                                                                       |
| Aromatic C-H stretch                        |                           |                           | (3140-3480, very<br>diffuse); (3070; 3055)                                                                                                                     | (3100-3300, very<br>diffuse); (3075; 3051)                                                               |
| CH stretch                                  | 2925; 2880                | 2940; 2925;<br>2880       | 2988; 2971; 2947; 2913;<br>2843                                                                                                                                | 2970; 2961; 2951; 2936;<br>2922; 2911; 2884; 2863;<br>2851; 2810                                         |
| C=C-CO-R                                    |                           |                           | 1684                                                                                                                                                           |                                                                                                          |
| O-C-O ring stretch                          | (1641)                    | (1642)                    |                                                                                                                                                                |                                                                                                          |
| Aryl-CH=CH-R                                |                           |                           | 1635; 1630; 1627; 1623                                                                                                                                         |                                                                                                          |
| H <sub>2</sub> O                            | (1641)                    | (1642)                    |                                                                                                                                                                |                                                                                                          |
| CH=CH-CH=CH                                 |                           |                           | 1602; (1590)                                                                                                                                                   |                                                                                                          |
| C6-Ring/aromatic stretch                    |                           |                           |                                                                                                                                                                | 1620;1616; (1610)                                                                                        |
| Aromatic C-C ring stretch                   |                           |                           | (1590); 1576; 1567;<br>1557; 1538; 1532; 1520;<br>1516; 1512; 1505; 1498;<br>1495; 1489; 1487; 1476;<br>1471; (1464; 1456;<br>1446; 1429; 1426; 1423;<br>1416) | (1610); 1587; 1512;<br>1507; 1498; 1496; 1490;<br>1476; (1465; 1456;<br>1449; 1442; 1436; 1432;<br>1419) |
| CH <sub>2</sub> and CH <sub>3</sub> bending | 1453; 1405                | 1453; 1405                | (1464; 1456; 1446;<br>1429; 1426; 1423;<br>1416); 1378; 1373                                                                                                   | (1465; 1456; 1449;<br>1442; 1436; 1432;<br>1419); 1383                                                   |
| C-H rock                                    | 1361; 1329                | 1361; 1329                | 1366                                                                                                                                                           | 1367; 1343; 1325;                                                                                        |
| CH <sub>3</sub> bending                     |                           |                           | 1318                                                                                                                                                           | 1318                                                                                                     |
| C-H/O-H in plane                            | 1270; 1243                | 1267; 1242                | 1283; 1274; 1258                                                                                                                                               | 1282; 1269; 1249; 1216                                                                                   |
| Aromatic C-O stretch                        |                           |                           | 1231                                                                                                                                                           | 1239; 1231                                                                                               |
| C-O-C                                       | 1207                      | 1207                      | 1203                                                                                                                                                           |                                                                                                          |
| C-O/C-C stretch                             | 1080; 1015                | 1081; 1030                | 1156; 1033; 1027                                                                                                                                               | 1129; 1118; 1103; 1081;<br>1071; 1062; 1057; 1048;<br>1033; 1022; 1012                                   |
| =CH-/>C-H out of plane                      |                           |                           | 987; 978; (961; 956);<br>814; (807)                                                                                                                            | (964; 949); 904; (849;<br>832; 819)                                                                      |
| C-O/C-C/C-OH bend                           |                           | 945                       | (961; 956); 932; 921                                                                                                                                           | (964; 949); 929; 917                                                                                     |
| C-H                                         | 857; 768; 706             | 858; 768; 706             | (865; 856); 728                                                                                                                                                | (873; 849)                                                                                               |
| Aromatic C-H out of plane                   |                           |                           | (865; 856; 807); 783;<br>759; 744; 713                                                                                                                         | (849; 832; 819); 786;<br>748; 733;719; 709; 651                                                          |
| C-C-O/C-C-H                                 | 762.9; 753.1              | 762.9; 752.3              |                                                                                                                                                                | 750.9                                                                                                    |
| CH <sub>2</sub> rock                        | 708.5                     | 707.3                     | (712.6)                                                                                                                                                        | 705.1                                                                                                    |
| C-C-H                                       | 667.8                     | 668                       | 655.7                                                                                                                                                          | 671.8                                                                                                    |

\* Values in parenthesis are interchangeable or mixed of various bands

Table S2: IR bands (in cm<sup>-1</sup>) of Curcumin βCD polymer physical mixtures and complexes (significant changes in red)

| Group                                       | Bead                              |                                           | βCDPIS                                   |                                     |
|---------------------------------------------|-----------------------------------|-------------------------------------------|------------------------------------------|-------------------------------------|
|                                             | Phys. Mixt.                       | Complex                                   | Phys. Mixt.                              | Complex                             |
| Phenolic O-H stretch/H-bond                 | 3582; 3544                        | <b>3590</b> ; 3582;                       | 3582; 3549; 3503                         |                                     |
| O-H stretch/H-bond                          | 3564                              | 3562                                      | 3563                                     | 3562                                |
| H-C=C-H                                     |                                   |                                           | 3016                                     |                                     |
| Aromatic C-H stretch                        |                                   |                                           |                                          |                                     |
| CH stretch                                  | 2923; 2878                        | <b>2943; 2926</b> ; 2879;<br><b>2803</b>  | 2923; 2880                               | <b>2943; 2926</b> ; 2878            |
| C=C-CO-R                                    |                                   |                                           |                                          |                                     |
| O-C-O ring stretch                          | (1650)                            | (1648)                                    |                                          | (1648)                              |
| Aryl-CH=CH-R                                | (1627)                            |                                           | (1627)                                   |                                     |
| H <sub>2</sub> O                            | (1650; 1627)                      | (1648)                                    | (1627)                                   | (1648)                              |
| CH=CH-CH=CH                                 | 1602;                             |                                           | 1602                                     |                                     |
| C6-Ring/aromatic stretch                    |                                   |                                           |                                          |                                     |
| Aromatic C-C ring stretch                   | 1563; 1555; 1507;<br>(1456); 1429 | <b>1512; 1452</b> ;                       | 1588; 1557; 1505;<br>(1456); 1429        | (1456)                              |
| CH <sub>2</sub> and CH <sub>3</sub> bending | (1456)                            | <b>1406</b>                               | (1456)                                   | (1456); <b>1405</b>                 |
| C-H rock                                    | 1362; 1329                        | 1361; 1328                                | 1366                                     | <b>1363; 1331; 1325</b> ;           |
| CH <sub>3</sub> bending                     | 1318                              |                                           | 1318                                     |                                     |
| C-H/O-H in plane                            | 1280; 1272; 1259                  | 1272; <b>1243</b>                         | 1283; 1259                               | <b>1276</b> ; 1261; 1244;<br>(1223) |
| Aromatic C-O stretch                        | 1233                              |                                           | 1233                                     | (1223)                              |
| C-O-C                                       | 1205                              | 1206                                      | 1205                                     | <b>1208</b>                         |
| C-O/C-C stretch                             | 1151; 1140; 1080;<br>1027; 1004   | <b>1160</b> ; 1081; <b>1021</b> ;<br>1005 | 1153; 1114; 1080;<br>1028; 1008          | 1080; 1029; <b>1005</b>             |
| =CH-/>C-H out of plane                      | 987; (963)                        | (960)                                     | 987; (963); (807)                        | (945)                               |
| C-O/C-C/C-OH bend                           | 932; (963)                        | (960); 921                                | (963); 932                               | (945)                               |
| C-H                                         | 887; (865; 856);<br>(707)         | 893; (855); (706)                         | 887; (865; 856);<br>(807; 728; 712)      | (857; (707)                         |
| Aromatic C-H out of plane                   | (865; 856); 814;<br>807; 759      | (855); 795; (759)                         | (865; 856); 783; 759;<br>744; (728; 712) | (857)                               |
| C-C-O/C-C-H                                 | (759)                             | (759)                                     | (759)                                    | (759)                               |
| CH <sub>2</sub> rock                        | (707)                             | (706)                                     | (712)                                    | (707)                               |
| C-C-H                                       | 650                               | 653                                       | 647                                      | 654                                 |

\* Values in parenthesis are interchangeable or mixed of various bands

Table S3: IR bands (in  $\text{cm}^{-1}$ ) of 17 $\beta$ -Estradiol  $\beta$ CD polymer physical mixtures and complexes (significant changes in red)

| Group                                       | Bead                                                                             |                                 | $\beta$ CDPIS                   |                            |
|---------------------------------------------|----------------------------------------------------------------------------------|---------------------------------|---------------------------------|----------------------------|
|                                             | Phys. Mixt.                                                                      | Complex                         | Phys. Mixt.                     | Complex                    |
| Phenolic O-H stretch/H-bond                 | 3586; 3543; 3428; 3419                                                           |                                 |                                 |                            |
| O-H stretch/H-bond                          | 3564                                                                             | 3564                            | 3561                            | 3561                       |
| H-C=C-H                                     | (3175; 3050)                                                                     |                                 |                                 | (3050)                     |
| Aromatic C-H stretch                        | (3175; 3050)                                                                     |                                 |                                 | (3050)                     |
| CH stretch                                  | 2961; 2951; 2936; 2922; 2911; 2884; 2862; 2810                                   | 2922; 2876                      | 2936; 2922; 2876                | 2936; 2922; 2876           |
| C=C-CO-R                                    | 1652                                                                             |                                 |                                 |                            |
| O-C-O ring stretch                          | (1645)                                                                           | (1645)                          | (1648)                          | (1648)                     |
| Aryl-CH=CH-R                                | 1622                                                                             |                                 | (1635; 1630; 1627); 1623        |                            |
| CH=CH-CH=CH                                 |                                                                                  |                                 | 1602; (1590)                    |                            |
| H <sub>2</sub> O                            | (1652; 1645)                                                                     | (1645)                          | (1648; 1635; 1630; 1627)        | (1648)                     |
| C6-Ring/aromatic stretch                    | (1610)                                                                           |                                 |                                 | 1620; 1616; (1610)         |
| Aromatic C-C ring stretch                   | (1610); 1587; 1558; 1540; 1533; 1507; 1496; 1476; (1465; 1456; 1449; 1436; 1419) | (1453; 1433; 1415)              | (1453; 1433; 1415)              | (1610); (1453; 1433; 1415) |
| CH <sub>2</sub> and CH <sub>3</sub> bending | (1465; 1456; 1449; 1436; 1419)                                                   | (1453; 1433; 1415); 1407        | (1453; 1433; 1415); 1407        | (1453; 1433; 1415); 1407   |
| C-H rock                                    | 1367; 1343; 1326                                                                 | 1367; 1325                      | 1367; 1326                      | 1367; 1326                 |
| CH <sub>3</sub> bending/C=O stretch         | 1318; 1303                                                                       |                                 | 1318; 1303                      | 1318                       |
| C-H/O-H in plane                            | 1290; 1282; 1269; 1249; 1239; 1231; 1216                                         | 1269; 1249                      | 1290; 1282; 1269; 1249          | 1282; 1269; 1249           |
| Aromatic C-O stretch                        |                                                                                  |                                 |                                 |                            |
| C-O-C/aromatic C-O                          | 1202                                                                             | 1208                            | 1211                            | 1208                       |
| C-O/C-C stretch                             | 1156; 1129; 1118; 1103; 1081; 1057; 1033; 1022; 1012                             | 1156; 1110; 1080; 1029; 1007    | 1153; 1129; 1081; 1030; 1008    | 1153; 1081; 1030; 1005     |
| =CH-/>C-H out of plane                      | (964; 951); (819)                                                                | (954); (820);                   | (964; 947); (859; 820)          | (951; 859)                 |
| C-O/C-C/C-OH bend                           | (964; 951); 929; 917; 904                                                        | (954); 934; 916;                | (947); 934                      | (951); 934                 |
| C-H                                         | 873; (849; 819; 786); (709)                                                      | (859; 820); (760); (709)        | (859; 820); (709)               | (859; 758; 709)            |
| Aromatic C-H out of plane                   | (849; 819; 786); (754); (709)                                                    | (859; 820); (760); (709); (653) | (859; 820); (758); (709); (656) | (859; 758; 709); (656)     |
| C-C-O/C-C-H                                 | (754); 733                                                                       | (760)                           | (758)                           | (758)                      |
| CH <sub>2</sub> rock                        | (709)                                                                            | (709)                           | (709)                           | (709)                      |
| C-C-H                                       | 636                                                                              | (653)                           | (656)                           | (656)                      |

\* Values in parenthesis are interchangeable or mixed of various bands
